# Supplementary material for: Hydrolytically stable ZIF-8@PDMS core–shell microspheres for gas–solid chromatographic separation
Source: Royal Society of Chemistry journal article supplement (doi:10.1039/c5ra26077a), 2016-01-01
Supplement: c5ra26077a1.pdf [file c5ra26077a1.pdf]

## Hydrolytically stable ZIF-8@PDMS Core–Shell Microspheres for Gas-Solid Chromatographic separations

Manju Srivastava <sup>a,b</sup>, Prasun Kumar Roy<sup>a</sup>, Arunachalam Ramanan<sup>b</sup>

<sup>a</sup> Centre for Fire, Explosive and Environment Safety, DRDO, Delhi-54, India

<sup>b</sup> Department of Chemistry, Indian Institute of Technology Delhi, New Delhi-16, India

### Effect of particle dimensions on pressure drop

The pressure drop associated with a gas flowing through packed tubes, decreases with the voidage in the tube ( $\epsilon$ ) as well as the length of the tube. The relation between these properties and Pressure drop is expressed by a correlation equation

$$\Delta P = \frac{2f_m \times G_i^2 \times L_t (1 - \epsilon)^{3-n}}{D_p \rho_f \phi_s^{3-n} \times \epsilon^3} \quad \text{.....Eq-1}$$

Where,

$\Delta P$  = pressure drop, psi

$L_t$  = depth of the packed bed, ft.

$G = \rho V$  = mass velocity, lb h<sup>-1</sup>ft<sup>2</sup>

$\rho$  = fluid density, lb ft<sup>-3</sup>

$D$  = effective particle diameter, ft.

$\epsilon$  = interparticle void fraction, dimensionless

$f_m$  = modified friction factor

$n$  = Reynolds number

$f_s$  = shape factor

$\phi_s$  = sphericity of the particle

By assuming a modified friction factor ( $f_m = 2$ ), Reynolds number ( $n = 2$ ), and a shape factor ( $f_s = 1$ ) for a perfect sphere, the pressure drops were calculated as a function of microsphere diameter and the resultant plots are presented in Fig. 1 The expanded portion is presented in the inset.

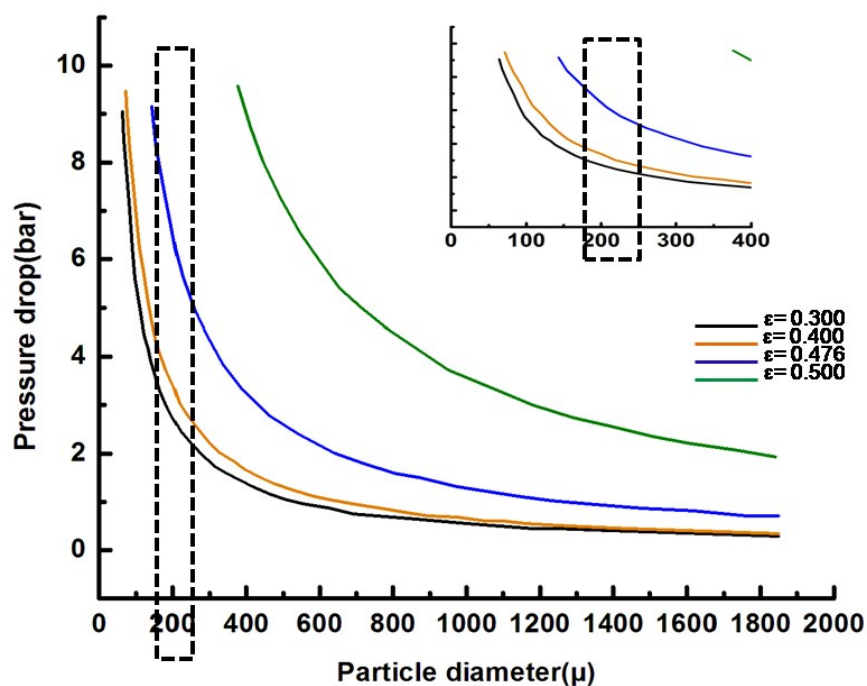

Fig. S1 : Pressure drops through a packed tube with a particle diameter ( $D_p$ ) and voidage ( $\epsilon$ ) by equation 1. Inset shows an expanded view.

It can be seen that the pressure drop increases steeply with decreasing particle dimensions. The pressure drop associated with the particle range used in the present study is presented in the dashed box (250-177  $\mu\text{m}$ ). As is apparent, further decrease in the particle size would lead to extremely high pressure drops which in turn would lead to operability issues in the gas chromatographic column. Further increase in packing efficiency (lower voidage) would further

aggravate the pressure drop issue. It is for this reason, that chromatographic separations were performed on stationary phase with these dimensions (250-177  $\mu\text{m}$ ).

### **Preparation of core microspheres**

The poly (dimethylsiloxane) (PDMS) core was prepared using a batch suspension polymerization process. A feed solution was prepared by dissolving vinyl terminated siloxane macromonomer (Elastosil M4644) in chloroform (60 % v/v) followed by the addition of requisite amounts of platinum based hardener (resin :hardener=10:1). The feed solution was introduced into a 1 L four-necked RB flask containing the suspending agent, PVA (1.5% w/v) through a rubber septum and was constantly stirred (600 rpm) at 45 °C. The polymerisation reaction was allowed to continue for 8 h. The reaction mixture was cooled and the microspheres were filtered, washed with water and dried under vacuum at 80 °C for 2 h. The extent of conversion was measured gravimetrically as the ratio of mass of microspheres to the amount of liquid macromonomer used for its preparation.

The effect of increasing the feed macromonomer solution concentration on the particle size distribution of the resultant microspheres is presented in Figure S2. As is evident, the distribution shifts towards larger sized microspheres as the concentration of siloxane in the feed increases, which can be attributed to the increased polymerisable content in the hydrophobic dispersed droplets. Morphological investigations reveal the smooth texture of the siloxane microspheres (Figure S2, Inset). In all cases, complete conversion (> 98%) could be achieved, as evidenced by gravimetric analysis.

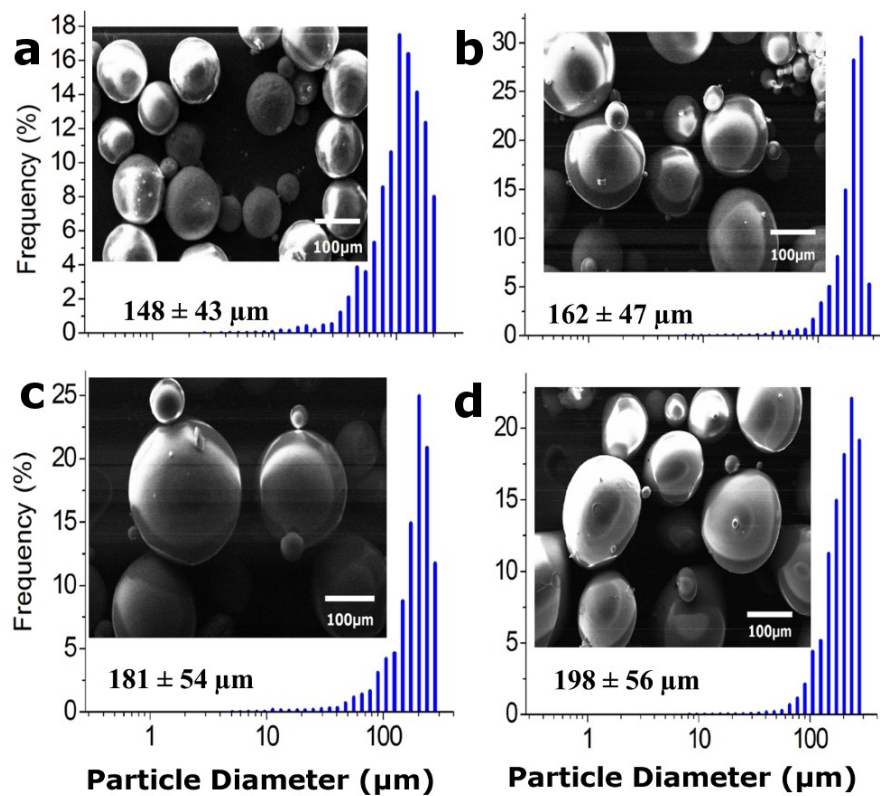

**Fig. S2.** Effect of feed concentration on the particle size distribution and surface morphology of PDMS microspheres (stirring speed 600 rpm). a) 30% b) 40% c) 50% d) 60%

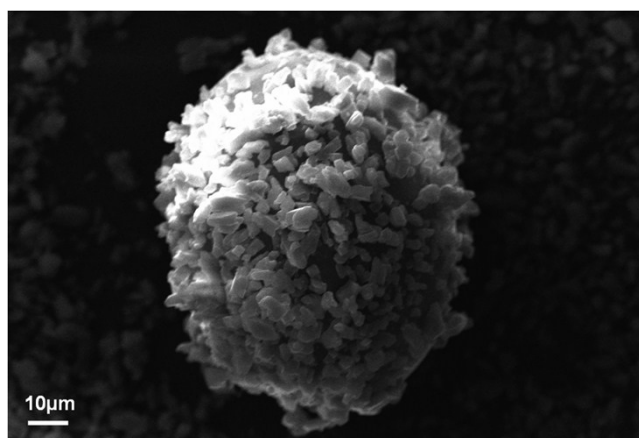

**Fig S3:** SEM image of a single core-shell microsphere

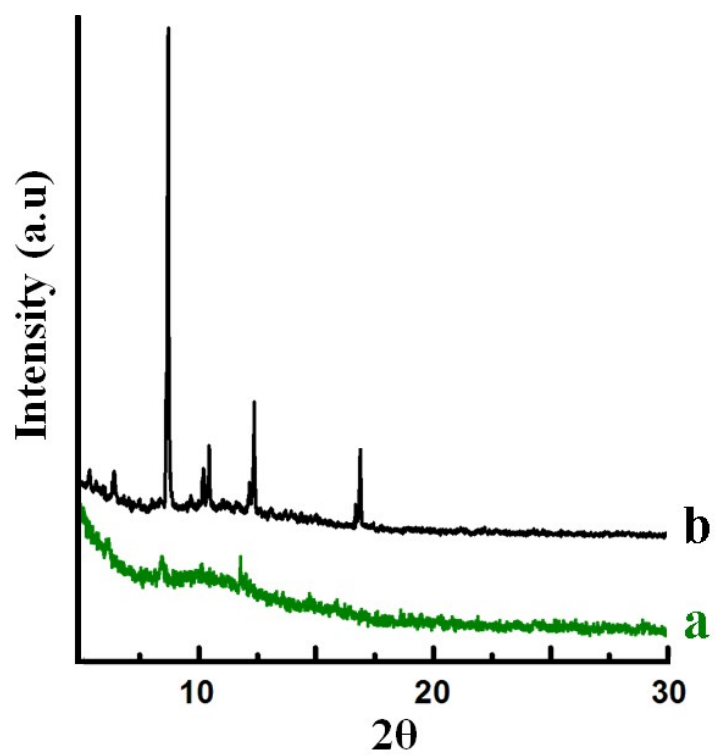

**Fig. S4:** PXRD pattern of a) PDMS, b) ZIF8@PDMS

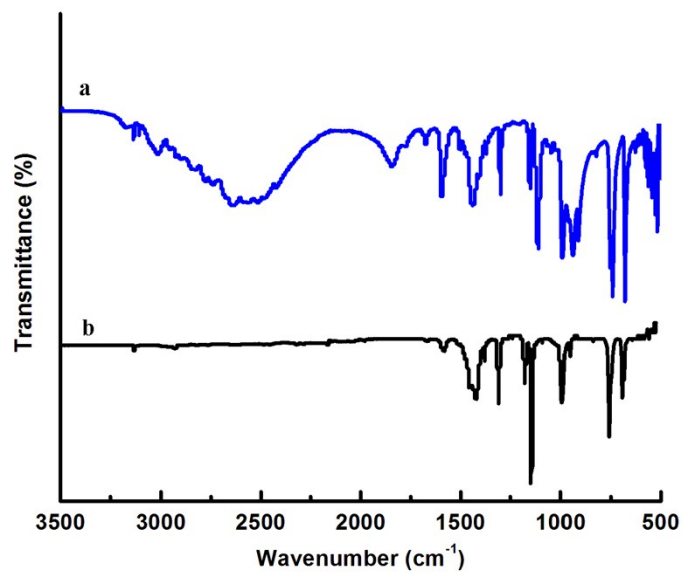

**Fig. S5:** FT-IR spectra of a) organic linker (2 methyl imidazole) and b) ZIF -8

**Table S1: GC conditions for analysis of natural gas**

| Reference in main text                                                            | Natural gas mixture |                |                      |
|-----------------------------------------------------------------------------------|---------------------|----------------|----------------------|
| Figure 6                                                                          | Composition         | Amount (% v/v) | Retention time (min) |
|                                                                                   | Methane             | 79.37          | 0.6                  |
|                                                                                   | Ethane              | 6.72           | 1.7                  |
|                                                                                   | Propane             | 8.09           | 3.6                  |
|                                                                                   | Carbon dioxide      | 5.04           | 4.3                  |
|                                                                                   | Iso-Butane          | 6.72           | 4.9                  |
|                                                                                   | n-Butane            | 1.31           | 9.4                  |
|                                                                                   | iso-Pentane         | 0.53           | 12.0                 |
|                                                                                   | n-Hexane            | 0.19           | 15.2                 |
| Injector Temperature : 60 °C, Oven Temperature: 70°C, Detector temperature: 110°C |                     |                |                      |

**Table S2: GC conditions for analysis of xylene mixtures**

| Reference in main text                                                              | Separation of xylene mixtures |            |                      |
|-------------------------------------------------------------------------------------|-------------------------------|------------|----------------------|
| Figure 7                                                                            | Composition                   | Amount (%) | Retention time (min) |
|                                                                                     | o- xylene                     | 28.5       | 1.2                  |
|                                                                                     | m- xylene                     | 57.2       | 2.2                  |
|                                                                                     | p- xylene                     | 14.3       | 4.4                  |
| Injector Temperature : 150 °C, Oven Temperature: 140°C, Detector temperature: 150°C |                               |            |                      |

**Table S3: GC conditions for analysis of ethanol-water solution**

| Reference<br>in main text                                                             | Separation of ethanol water mixture |                                  |                      |
|---------------------------------------------------------------------------------------|-------------------------------------|----------------------------------|----------------------|
| Figure 8                                                                              | Composition                         | Ethanol concentration (%<br>v/v) | Retention time (min) |
|                                                                                       | Ethanol-water                       | 4                                | 1.2                  |
|                                                                                       | Ethanol-water                       | 8                                | 1.2                  |
|                                                                                       | Ethanol-water                       | 12                               | 1.2                  |
|                                                                                       | Ethanol-water                       | 16                               | 1.2                  |
| Injector Temperature : 150 °C, Oven Temperature: 110 °C, Detector temperature: 150 °C |                                     |                                  |                      |

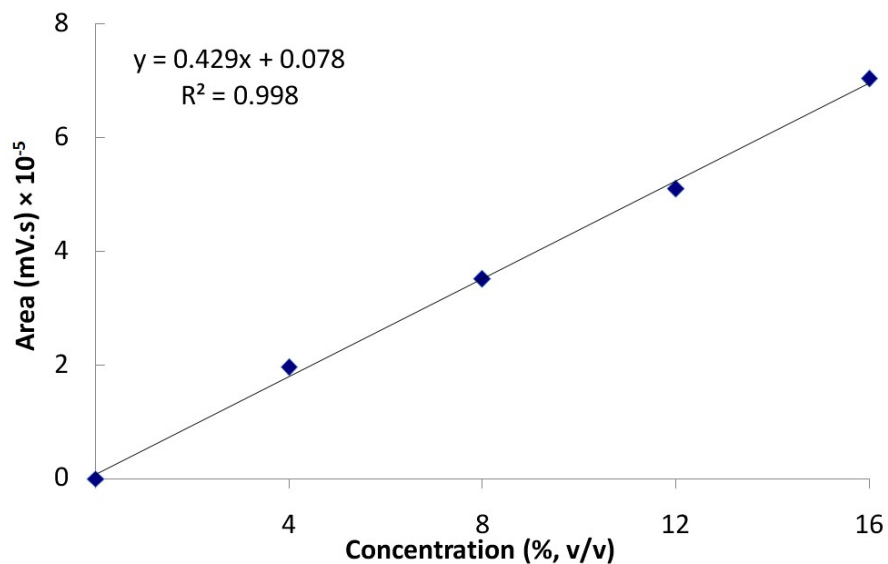

**Fig. S6: Ethanol- water solutions:- FID response Area vs concentration plot.**

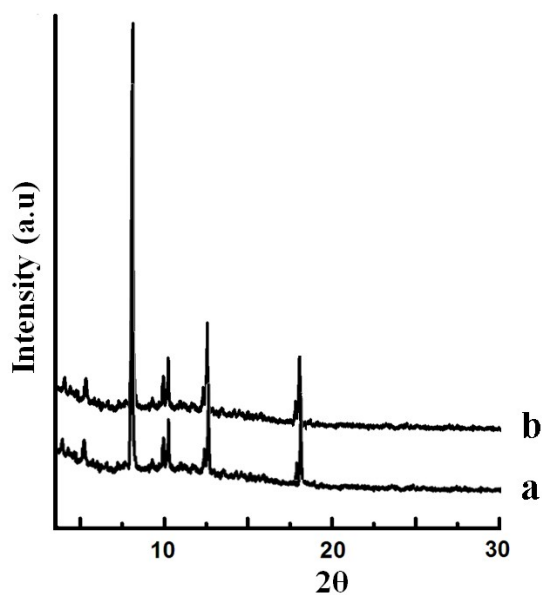

**Fig. S7:** PXRD of ZIF 8 a) as prepared b) after placing in ethanol-water mixture (16% v/v).

**Table S4: GC conditions for analysis of hexane-octane solution**

| Reference<br>in main text                                                           | Separation of hexane- octane solution |                           |                      |
|-------------------------------------------------------------------------------------|---------------------------------------|---------------------------|----------------------|
| Figure 9a                                                                           | Composition                           | Concentration (%)<br>v/v) | Retention time (min) |
|                                                                                     | Hexane (b.pt 68°C)                    | 75                        | 1.4                  |
|                                                                                     | Octane (b.pt 125°C)                   | 25                        | 3.7                  |
| Injector Temperature : 170 °C, Oven Temperature: 160°C, Detector temperature: 170°C |                                       |                           |                      |

**Table S5: GC conditions for separation of benzene-toluene**

| Reference | Separation of benzene-toluene solution |
|-----------|----------------------------------------|
|-----------|----------------------------------------|



|                                                                                      |                      |                       |                      |
|--------------------------------------------------------------------------------------|----------------------|-----------------------|----------------------|
| in main text                                                                         |                      |                       |                      |
| Figure 9b                                                                            | Composition          | Concentration (% v/v) | Retention time (min) |
|                                                                                      | Benzene(b.pt 80°C)   | 66.7                  | 1.2                  |
|                                                                                      | Toluene (b.pt 110°C) | 33.3                  | 1.9                  |
| Injector Temperature : 150 °C, Oven Temperature: 140°C, Detector temperature: 150 °C |                      |                       |                      |

**Table S6: GC conditions for separation of benzene-toluene-m-xylene**

|                                                                                     |                                                   |                       |                      |
|-------------------------------------------------------------------------------------|---------------------------------------------------|-----------------------|----------------------|
| Reference in main text                                                              | Separation of Hexane and Petroleum ether solution |                       |                      |
| Figure 9c                                                                           | Composition                                       | Concentration (% v/v) | Retention time (min) |
|                                                                                     | Benzene (b.pt 80°C)                               | 25                    | 1.0                  |
|                                                                                     | Toluene(b.pt 110°C)                               | 50                    | 1.8                  |
|                                                                                     | m-xylene (b.pt 138°C)                             | 25                    | 3.0                  |
| Injector Temperature : 140 °C, Oven Temperature: 130°C, Detector temperature: 140°C |                                                   |                       |                      |
